# Supplementary material for: Space charge-induced unusually-high mobility of a solution-processed indium oxide thin film transistor with an ethylene glycol incorporated aluminum oxide gate dielectric
Source: Royal Society of Chemistry journal article supplement (doi:10.1039/c5ra21022d), 2015-01-01
Supplement: c5ra21022d1.pdf [file c5ra21022d1.pdf]

(Supplementary Information)

**Space Charge-Induced Unusually-High Mobility of Solution-Processed Indium Oxide Thin Film Transistor with Ethylene Glycol Incorporated Aluminum Oxide Gate Dielectric**

*Hyungjin Park<sup>‡a</sup>, Yunyong Nam<sup>‡a</sup>, Jungho Jin<sup>b</sup>, and Byeong-Soo Bae<sup>a\*</sup>.*

<sup>a</sup>Laboratory of Optical Materials and Coating (LOMC), Department of Materials Science and Engineering, Korea Advanced Institute of Science and Technology (KAIST), 291 Daehak-ro, Yuseong-gu, Daejeon 305-701, Korea.

<sup>b</sup>Multiscale Hybrid Materials Laboratory (MHML), School of Materials Science and Engineering, University of Ulsan, 93 Daehak-ro, Nam-gu, Ulsan 680-749, Korea

\*Corresponding author. E-mail address: [bsbae@kaist.ac.kr](mailto:bsbae@kaist.ac.kr)

<sup>‡</sup>Both Hyungjin Park and YunYong Nam contributed equally.

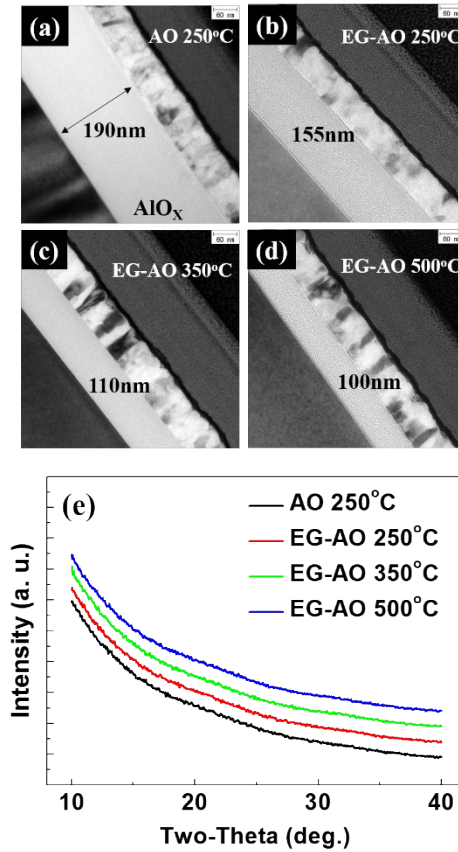

**Fig. S1.** Cross sectional TEM images of the gate dielectric layer: (a) AO 250oC, (b) EG-AO 250oC, (c) EG-AO 350oC, and (d) EG-AO 500oC. (e) XRD spectra of AO and EG-AO gate dielectric layers annealed at various temperatures.

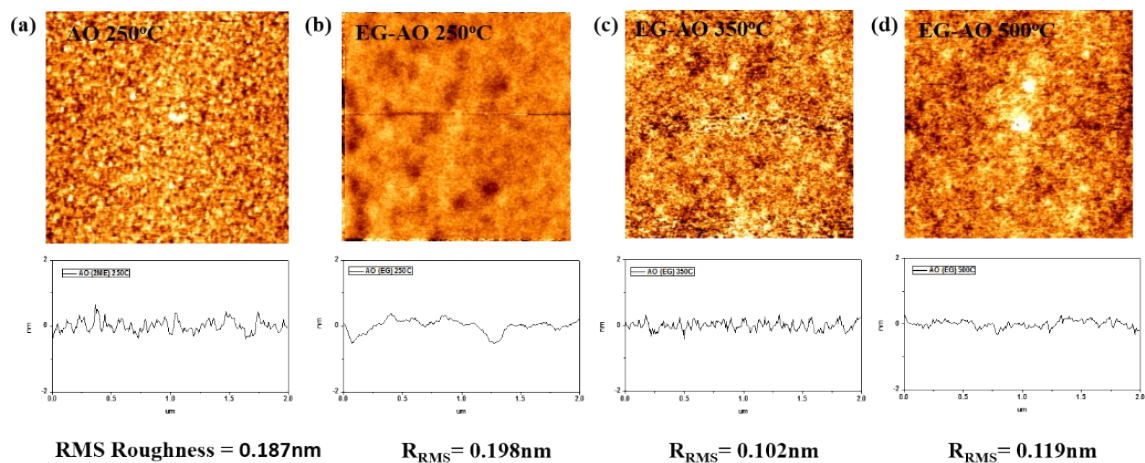

**Fig. S2.** AFM images and line profiles of (a) AO 250°C, (b) EG-AO 250°C, (c) EG-AO 350°C, and EG-AO 500°C gate dielectric layer.

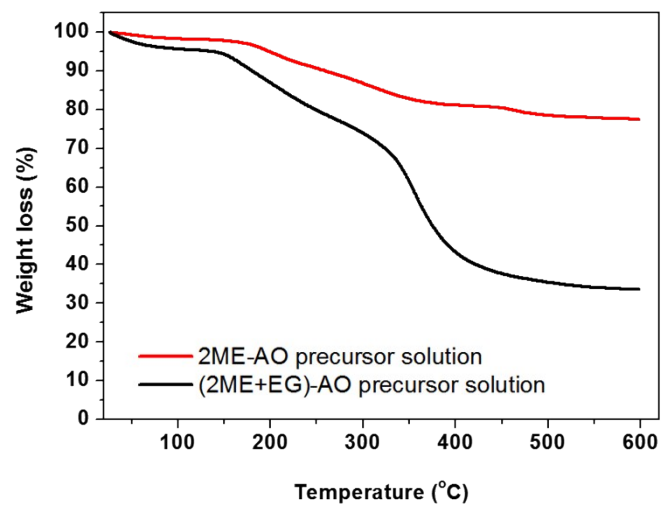

**Fig. S3.** TGA results of AO precursor solution (only 2-ME for solvent) and EG-AO precursor solution (both 2-ME and EG) after drying 120 °C.
